## Stop the crop: insights into the insecticidal mode of action of cinnamodial against mosquitoes

### Contributors:

Megha Kalsi<sup>1</sup>, Anton Walter<sup>1</sup>, Beenhwa Lee<sup>1</sup>, Andrew DeLaat<sup>1</sup>, Renata Rusconi Trigueros<sup>1</sup>, Katharina Happel<sup>1</sup>, Rose Sepesy<sup>1</sup>, Bao Nguyen<sup>1</sup>, Preston K. Manwill<sup>2,3</sup>, H. Liva Rakotondraibe<sup>2,3\*</sup>, Peter M. Piermarini<sup>1,3\*</sup>

<sup>1</sup> Department of Entomology, The Ohio State University, Ohio Agricultural Research and Development Center, Wooster, Ohio, 44691, USA

<sup>2</sup> Departments of Medicinal Chemistry and Pharmacognosy, The Ohio State University, Columbus, Ohio, 43210, USA

<sup>3</sup> Center for Applied Plant Sciences, The Ohio State University, Columbus, Ohio, 43210, USA

\*Corresponding Authors

### Correspondence:

Peter M. Piermarini, Ph.D.  
The Ohio State University  
224 Thorne Hall  
1680 Madison Ave  
Wooster, OH 44691  
330-263-3641  
[piermarini.1@osu.edu](mailto:piermarini.1@osu.edu)

L. Harinantenaina Rakotondraibe, Ph.D.  
The Ohio State University  
434 Parks Hall  
500 W 12th Avenue  
Columbus, OH 43210  
614-292-4733  
[rakotondraibe.1@osu.edu](mailto:rakotondraibe.1@osu.edu)

### Keywords:

*Aedes aegypti*; ventral diverticulum; calcium channels; visceral muscle; natural products

## Abstract:

Cinnamodial (CDIAL) is a drimane sesquiterpene dialdehyde found in the bark of Malagasy medicinal plants (*Cinnamosma* species; family Canellaceae). We previously demonstrated that CDIAL was insecticidal, antifeedant, and repellent against *Aedes aegypti* mosquitoes. The goal of the present study was to generate insights into the insecticidal mode of action for CDIAL, which is presently unknown. We evaluated the effects of CDIAL *in vitro* on the contractility of the ventral diverticulum (crop) in adult female *Ae. aegypti*. The crop is a food storage organ surrounded by visceral muscle that spontaneously contracts *in vitro*. We found that CDIAL completely inhibited spontaneous contractions of the crop as well as those stimulated by the agonist 5-hydroxytryptamine. Several derivatives of CDIAL with known insecticidal activity also inhibited crop contractions. Morphometric analyses of crops suggested that CDIAL induced a tetanic paralysis that was dependent on extracellular  $\text{Ca}^{2+}$  and inhibited by  $\text{Gd}^{3+}$ , a non-specific blocker of plasma membrane  $\text{Ca}^{2+}$  channels. Screening of numerous pharmacological agents revealed that a  $\text{Ca}^{2+}$  ionophore (A23187) was the only compound other than CDIAL to completely inhibit crop contractions via a tetanic paralysis. Taken together, our results suggest that CDIAL inhibits crop contractility by elevating intracellular  $\text{Ca}^{2+}$  through the activation of plasma membrane  $\text{Ca}^{2+}$  channels thereby leading to a tetanic paralysis, which may explain the insecticidal effects of CDIAL against mosquitoes. Our pharmacological screening efforts also revealed the presence of two regulatory pathways in mosquito crop contractility not previously described: an inhibitory glutamatergic pathway and a stimulatory octopaminergic pathway. The latter was also completely inhibited by CDIAL.

## Introduction

Vector control with chemical insecticides is common strategy employed in the management of mosquito-borne diseases. Unfortunately, the overuse of chemicals with limited and sometimes redundant modes of action has strongly selected for insecticide resistance in mosquito populations. Thus, to maintain a useful chemical arsenal for controlling mosquitoes and their transmission of pathogens, the discovery and development of insecticides with novel modes of action are required (Hemingway et al., 2006; Shaw and Catteruccia, 2019). Plant secondary metabolites are valuable resources for discovering and developing new insecticides (Lorsbach et al., 2019; Norris et al., 2018; Sparks et al., 2019). Notably, several successful classes of insecticides exploit similar modes of action as plant secondary metabolites, including pyrethroids, neonicotinoids, carbamates, and diamides.

Cinnamodial (CDIAL) is a drimane-type, dialdehyde-bearing sesquiterpene isolated from the bark of Malagasy medicinal plants (*Cinnamosma* species of the family Canellaceae). We recently demonstrated that CDIAL was capable of killing larval and adult female mosquitoes (*Aedes aegypti*, *Anopheles gambiae*, *Culex pipiens*) (Inocente et al., 2018). Notably, the insecticidal potency of CDIAL was similar against pyrethroid-susceptible and pyrethroid-resistant lines of *Ae. aegypti*, suggesting a unique mode of action compared to pyrethroids (Inocente et al., 2018). CDIAL was also antifeedant and repellent against adult female *Ae. aegypti* and an agonist of mosquito transient receptor potential ankyrin 1 (TRPA1) channels (Inocente et al., 2018). Although agonism of TRPA1 channels by CDIAL was responsible for its antifeedant activity, and likely contributed to the repellent effects against mosquitoes, TRPA1 modulation was not required for the insecticidal activity of CDIAL (Inocente et al., 2018). Consistent with this notion, the insecticidal and antifeedant activities of various natural and semi-synthetic derivatives of CDIAL often do not correlate (Inocente et al., 2019; Manwill et al., 2020). Thus, the mode of insecticidal activity for CDIAL is currently unknown and appears to be independent from its mode of antifeedant activity, which is by TRPA1 activation.

The goal of the present study was to generate insights into the insecticidal mode of action for CDIAL by assessing the effects it has on the contractile activity of the ventral diverticulum (crop) in adult female *Ae. aegypti*. The crop is a diverticulation of the foregut in adult flies (order Diptera) and plays a key role in food storage (Stoffolano and Haselton, 2013). The lumen of the crop consists of a cuticular-lined epithelium surrounded on the serosal side by a meshwork of visceral muscle; the latter undergoes rhythmic peristaltic contractions when the crop is full (Stoffolano and Haselton, 2013). The mosquito crop is the primary receptacle of imbibed sugar solutions, such as floral nectars in the field or sucrose in the laboratory (Day, 1954; Trembley, 1952). Peristaltic contractions of the crop empty its contents into the midgut for digestion and absorption. We demonstrated previously that the crop of *Ae. aegypti* undergoes spontaneous peristaltic contractions *in vitro* that are  $\text{Ca}^{2+}$ -dependent, stimulated by 5-hydroxytryptamine (5-HT), and inhibited by a chemical mimic of myosuppressins, benzethonium chloride (Calkins et al., 2017). Here we demonstrate that CDIAL completely inhibits the spontaneous and 5-HT stimulated contractions of the crop *in vitro*. In addition, by comparing the inhibitory effects of CDIAL with other pharmacological agents, a hypothesis is generated as to the mode of insecticidal action for CDIAL against mosquitoes. Furthermore, this study provides new insights into the physiological regulation of crop contractility in mosquitoes.

## Materials and Methods

### *Mosquitoes*

Eggs of *Ae. aegypti* were obtained originally from the Malaria Research and Reference Reagent Resource Center (MR4) as part of the BEI Resources Repository (Liverpool strain; LVP-IB12 F19, deposited by M.Q. Benedict). Mosquitoes were reared to adults as described previously (Piermarini et al., 2011) and held in environmentally-controlled chambers (28°C, 80% relative humidity, 12 h:12 h light:dark cycle). Tetramin flakes (Melle, Germany) were pulverized and fed to larvae daily. Adults were maintained on 10% sucrose *ad libitum*. To generate additional eggs, adult females were periodically fed defibrinated rabbit blood (Hemostat Laboratories, Dixon, CA) with a membrane feeder (Hemotek, Blackburn, UK).

### *Isolation of mosquito crops and hindguts*

Crops were isolated from non-blood fed adult females (3-10 days post-emergence) under mosquito Ringer's solution as previously described (Calkins et al., 2017). If a crop was leaking its contents, filled with air bubbles, or not contracting spontaneously, then it was discarded. The Ringer's solution consisted of the following in mM: 150 NaCl, 3.4 KCl, 1.7 CaCl<sub>2</sub>, 1.8 NaHCO<sub>3</sub>, 1 MgCl<sub>2</sub>, 5 Glucose, and 25 HEPES. The pH of the Ringer's solution was adjusted to 7.1 with 1 N NaOH and its osmolality verified to be 330 ± 5 mOsmol/kg with a vapor pressure osmometer (Wescor, Logan, UT). In some experiments we used a 'zero Ca<sup>2+</sup>' Ringer's solution in which CaCl<sub>2</sub> was excluded and 1 mM EGTA (Thermo Fisher Scientific, Waltham, MA) was added.

The hindguts from adult females were also utilized for some experiments. In brief, the alimentary canal was isolated under Ringer's solution by tugging the last abdominal segment with fine forceps (Dumont #5; Fine Science Tools, Inc., Foster City, CA). The ileum of the hindgut was isolated by pinching it off from its junctions with the midgut and rectum with fine forceps.

### *Chemicals*

All natural drimane sesquiterpenes were isolated from medicinal plants and their structures were determined as previously described (He et al., 2017; Inocente et al., 2019; Inocente et al., 2018; Manwill et al., 2020). In brief, cinnamodial (CDIAL), polygodial (POLYG), ugandensolide (UGAN), cinnamosmolide (CMOS), cinnamolide (CML), drimenin (DRIM), and capsicodendrin (CPCD) were isolated from the bark of *Cinnamosma fragrans* Baill (Canellaceae), whereas warburganal (WARB) was isolated from the bark of *Warburgia ugandensis* Sprague (Canellaceae) (Inocente et al., 2019). Their structures are shown in Supplemental Fig. 1. Semi-synthetic derivatives of CDIAL were produced as described previously (Manwill et al., 2020). Herein, the derivatives are referred to as CD02, CD03, CD04, CD05, CD06, CD08, CD09, CD10, CD11, CD12. Their structures are shown in Supplemental Fig. 2. All drimane sesquiterpenes and CDIAL derivatives were dissolved in dimethyl sulfoxide (DMSO, Thermo Fisher Scientific) at 100-

times the final assay concentrations. In some experiments CPCD was dissolved in acetone (Thermo Fisher Scientific) at 100-times the final assay concentration. The other pharmacological agents utilized in the present study and their respective solvents are listed in Supplemental Table 1.

#### *Measurements of crop and hindgut contraction rates in vitro*

We utilized an *in vitro* assay previously established for mosquito crops (Calkins et al., 2017). In brief, an isolated crop or hindgut was transferred to a single well of a 96-well microtiter plate (USA Scientific, Ocala, FL) containing 100  $\mu$ l of Ringer's solution where it rested for 5 min. After the rest period, the frequency of crop or hindgut contractions was counted by eye under a stereoscope every other minute for 5 min (i.e., during the first, third, and fifth minute following the rest period). These contraction frequencies were averaged together and considered the 'control' rate. After the final control observation, 1  $\mu$ l of Ringer's solution was removed from the well and replaced with 1  $\mu$ l of a treatment solution (see *Chemicals*), followed by gentle mixing via pipetting. After a 2 min incubation period, the frequency of contractions was counted again every other minute for 5 min. These contraction frequencies were averaged together and referred to as the 'treatment' rate. Our previous study (Calkins et al., 2017) and preliminary trials in the present study found that the solvents did not affect contraction rates at a 1% final assay concentration. In some experiments a 'pre-treatment' period with CDIAL, 5-HT, or octopamine (OA) preceded the 'treatment' period.

#### *Crop morphometric analyses*

To determine if treatments affected crop shape, crops were prepared for the *in vitro* assay as described above and recorded under a stereoscope (40x total magnification) with a digital camera (Dino-Lite, Torrance, CA). The recordings consisted of a 5 min control period followed by a 5 min treatment period. Video recordings were played back on a personal computer using the 'Movies & TV' app in *Windows 10* (Microsoft, Redmond, WA). Three still images were saved as JPG files during the control period when the

crop was in a fully relaxed/flaccid state. Another still image was saved five minutes into the treatment period.

For each crop, the JPG files were opened with *Fiji* image analysis software (Schindelin et al., 2012). The perimeter of each crop was traced carefully using the polygon selection tool and the edges were rounded using the 'Fit Spline' function. The following steps under the 'Edit' menu were then performed to simplify the image: 'Clear Outside'; 'Clear'; and 'Fill'. The simplified image was converted to '8-bit' format to make it compatible with the *MorphoLibJ* morphometrics plug-in (Legland et al., 2016), which was used to fit an object-oriented bounding box (OOBB) to the crop. The length of the OOBB was a measure of the crop's distal to proximal length; the width of the OOBB was a measure of its girth. An 'oriented box elongation ratio' (OBER) was calculated by dividing the width of the OOBB by its length. A ratio of 1.0 indicated a circular shape; a ratio <1.0 indicated a more elongate shape (Wirth, 2004). The three OBER measurements from the control period were averaged together.

### *Statistics*

All statistical analyses were performed in *Prism* 6.07 (GraphPad Software Inc., La Jolla, CA). The specific tests utilized are described in the text of the **Results** and figure legends.

## **Results**

### *CDIAL inhibits the frequency of crop contractions*

We first determined the effects of CDIAL on the frequency of spontaneous crop contractions. Initial experiments found that adding 0.1  $\mu\text{M}$  CDIAL to the bath reduced the spontaneous contraction rates by ~15% (Fig. 1A). However, a 10-fold higher concentration of CDIAL (1  $\mu\text{M}$ ) did not affect the frequency of crop contractions (Fig. 1B). On the other hand, a 100-fold higher concentration (10  $\mu\text{M}$  CDIAL) consistently and completely inhibited the spontaneous contractions (Fig. 1C).

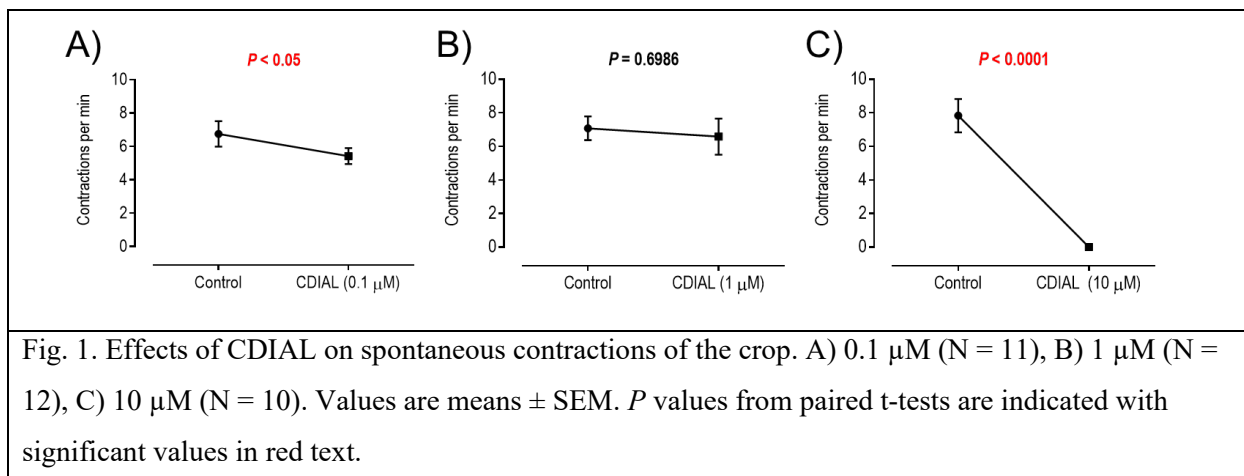

We next determined whether 10  $\mu$ M CDIAL also inhibited crops stimulated with 5-hydroxytryptamine (5-HT). We previously demonstrated that 5-HT is a potent agonist of mosquito crop contractions (Calkins et al., 2017). Here we confirm that 100 nM 5-HT increased the frequency of crop contractions (Fig. 2A). Subsequent treatment with 10  $\mu$ M CDIAL completely inhibited crop contractions (Fig. 2A). In contrast, if 1% DMSO (solvent for CDIAL) was added to the bath, then the 5-HT-stimulated contractions continued unperturbed (Supplemental Fig. 3A). We also tested whether CDIAL treatment prevented the stimulatory effects of 5-HT. As shown in Fig. 2B, if crops were first treated with 10  $\mu$ M CDIAL, which completely stopped the spontaneous contractions, then subsequent addition of 100 nM 5-HT had no effect (Fig. 2B). We also tested CDIAL on the adult female hindgut to determine if it inhibited spontaneous contractions of another visceral muscle. As shown in Supplemental Fig. 3B, 10  $\mu$ M CDIAL inhibited the spontaneous contraction rates of the hindgut by  $\sim$ 92%.



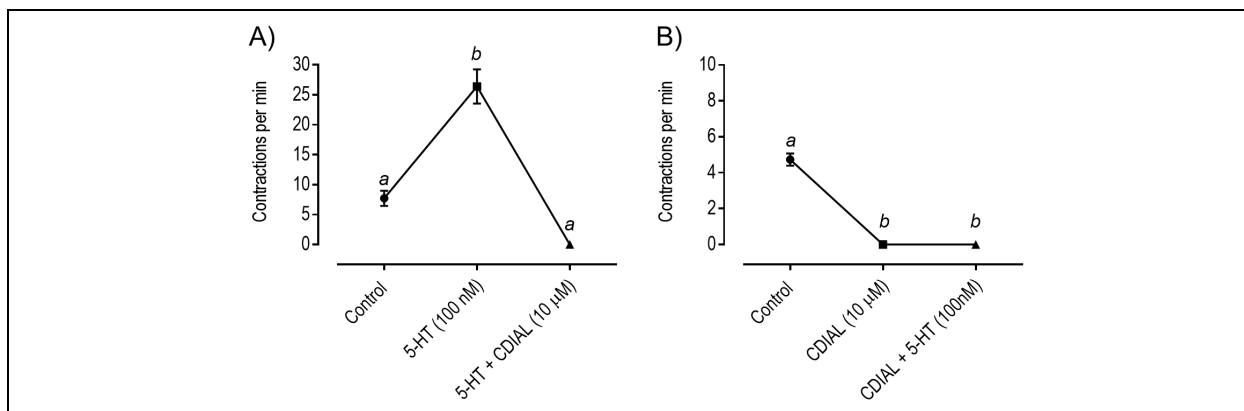

Fig. 2. Effects of CDIAL on 5-HT-stimulated peristaltic contractions of the crop. A) Crops were stimulated with 100 nM 5-HT before addition of 10  $\mu$ M CDIAL (N = 5). B) Crops were treated with 10  $\mu$ M CDIAL before addition of 100 nM 5-HT (N = 5). Values are means  $\pm$  SEM. Lower-case letters indicate statistical categorization of the means as determined by a repeated measures one-way ANOVA and Tukey's multiple comparisons test ( $P < 0.05$ ).

We next investigated whether several natural or semi-synthetic derivatives of CDIAL, which we have previously assessed for insecticidal and antifeedant activities against mosquitoes (Inocente et al., 2019; Inocente et al., 2018; Manwill et al., 2020), affected the frequency of crop contractions. First, we confirmed that 10  $\mu$ M CDIAL completely inhibited the spontaneous contractions (Supplemental Fig. 4A; Fig. 3). Among the natural monomeric derivatives tested (all at 10  $\mu$ M), the dialdehydes POLYG and WARB inhibited crop contraction rates by  $\sim$ 82 and 65%, respectively (Supplemental Fig. 4B-C; Fig. 3), whereas the lactone derivative UGAN stimulated crop contraction rates by  $\sim$ 50% (Supplemental Fig. 4D; Fig. 3). The other lactone derivatives, CMOS, CML, and DRIM, did not affect the frequency of crop contractions (Supplemental Fig. 4E-G). We also tested CPCD, a natural dimeric derivative of CDIAL with only one aldehyde group (Supplemental Fig. 1). CPCD completely stopped crop contractions when it was dissolved in DMSO (Supplemental Fig. 4H; Fig. 3). However, when it was dissolved in acetone, CPCD did not affect contraction rates (Supplemental Fig. 4I). Among the semi-synthetic CDIAL derivatives tested (all at 10  $\mu$ M), CD02, CD03, CD04, CD05, CD06, and CD10 showed no detectable effects (Supplemental Fig. 4A-E, H). On the other hand, CD08, CD09, CD11, and CD12 inhibited crop contraction rates by  $\sim$ 83, 58, 20, and 22%, respectively (Supplemental Fig. 5F-G, I-J; Fig. 3).

In summary, among compounds that affected crop contraction rates, CDIAL and CPCD (dissolved in DMSO) were the most efficacious inhibitors (Fig. 3). POLYG, WARB, CD08, and CD09 were moderate inhibitors causing ~50-82% inhibition. CD11 and CD12 were weak inhibitors causing <25% inhibition (Fig. 3). On the other hand, UGAN was an activator (Fig. 3). All of the moderate-strong or complete inhibitors of crop contractions rates were previously shown to be insecticidal ('\*' in Fig. 3) against adult female and/or larval *Ae. aegypti* (Inocente et al., 2019; Inocente et al., 2018; Manwill et al., 2020).

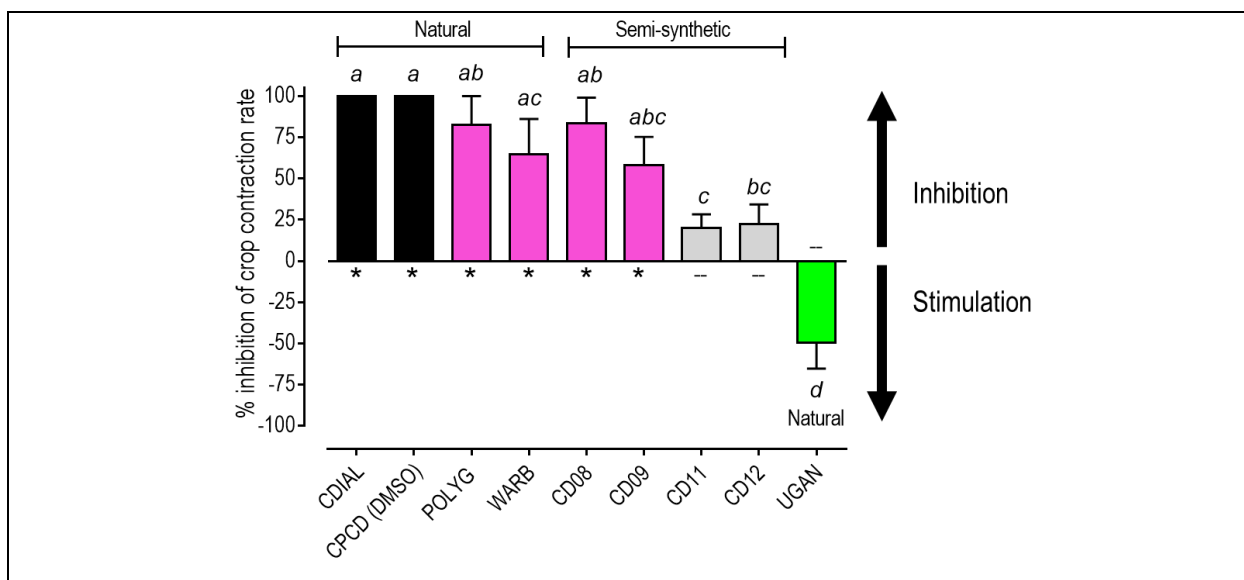

Fig. 3. Percent inhibition of spontaneous crop contraction rates by CDIAL derivatives with significant effects. Values are means  $\pm$  SEM, based on the percent inhibition of control contraction rates in Supplemental Figs. 4&5. Lower-case letters indicate statistical categorization of the means as determined by a repeated measures one-way ANOVA and Tukey's multiple comparisons test ( $P < 0.05$ ). Colors indicate qualitative categorization of effects: black = 100% inhibition; magenta = moderate-strong inhibition (>50%); gray = weak inhibition (<50%); and green = stimulation. '\*' or '--' respectively indicate compounds with or without previously demonstrated insecticidal activity against *Ae. aegypti* (Inocente et al., 2019; Inocente et al., 2018; Manwill et al., 2020).

#### *Modulators of neurotransmitter receptors, but not acetylcholinesterase, affect crop contraction rates*

Previous studies have found that plant-derived insecticides modulate neurotransmitter receptors, such as Cys-loop gated ion channels and G protein-coupled receptors, and/or inhibit acetylcholinesterase

(Anderson and Coats, 2012; Furutani et al., 2014; Liao et al., 2016; Tong et al., 2013). Thus, we tested whether the inhibition of crop contraction frequency by CDIAL might be explained by modulation of similar mechanisms. First, we screened the effects of various neurotransmitters (all at 1 mM) on crop contraction rates. As shown in Supplemental Fig. 6A-C and Fig. 4, glutamate, acetylcholine, and GABA inhibited the frequency of crop contractions by ~80, 30, and 10%, respectively. On the other hand, OA increased the frequency of crop contractions by ~250% (Supplemental Fig. 6D; Fig. 4). Neither histamine nor aspartate affected crop contraction rates (Supplemental Fig. 6E-F). The percent inhibition by glutamate was greater than that of acetylcholine and GABA (Fig. 4).

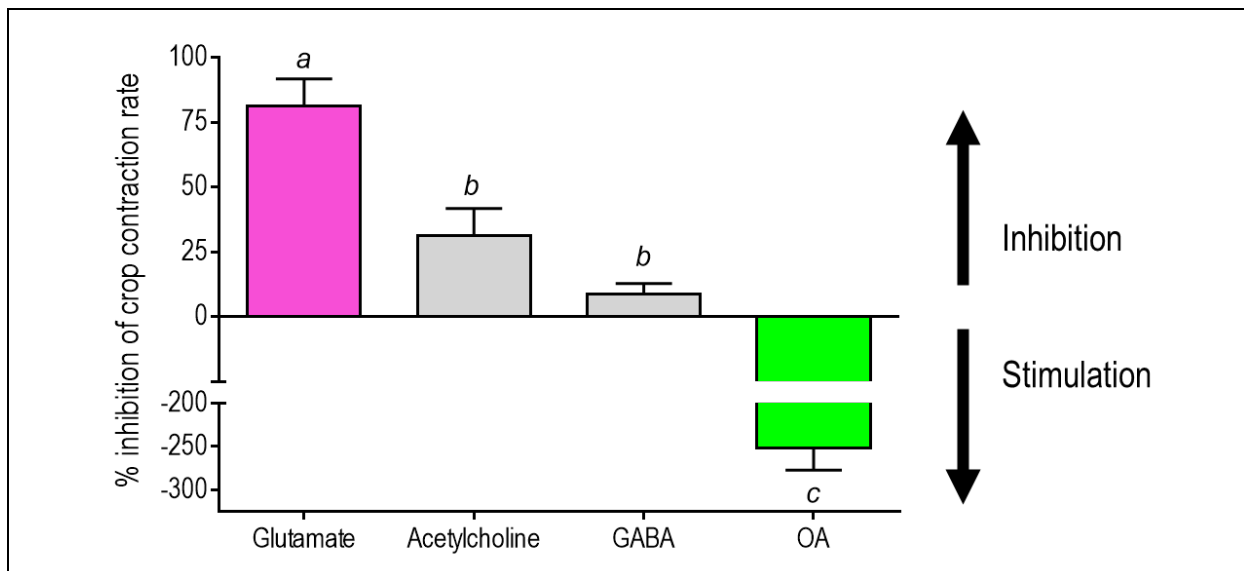

Fig. 4. Percent inhibition of spontaneous crop contraction rates by neurotransmitters (1 mM) with significant effects. Values are means  $\pm$  SEM, based on the percent inhibition of control contraction rates in Supplemental Fig. 6. Lower-case letters and colors respectively indicate statistical and qualitative categorizations of the effects as in Fig. 3.

To further characterize the inhibition of crop contractions by glutamate we screened more discriminating modulators of glutamate receptors. Notably, two agonists of glutamate-gated chloride (GluCl) channels, ivermectin (5  $\mu$ M) and ibotenate (1 mM), each completely inhibited crop contractions (Supplemental Fig. 7A-B; Fig. 5). Among agonists of ionotropic glutamate receptors tested (all at 1 mM), NMDA inhibited

crop contraction rates ~28% (Supplemental Fig. 7C; Fig. 5), whereas neither quisqualate nor kainate affected crop contraction rates (Supplemental Fig. 7D-E).

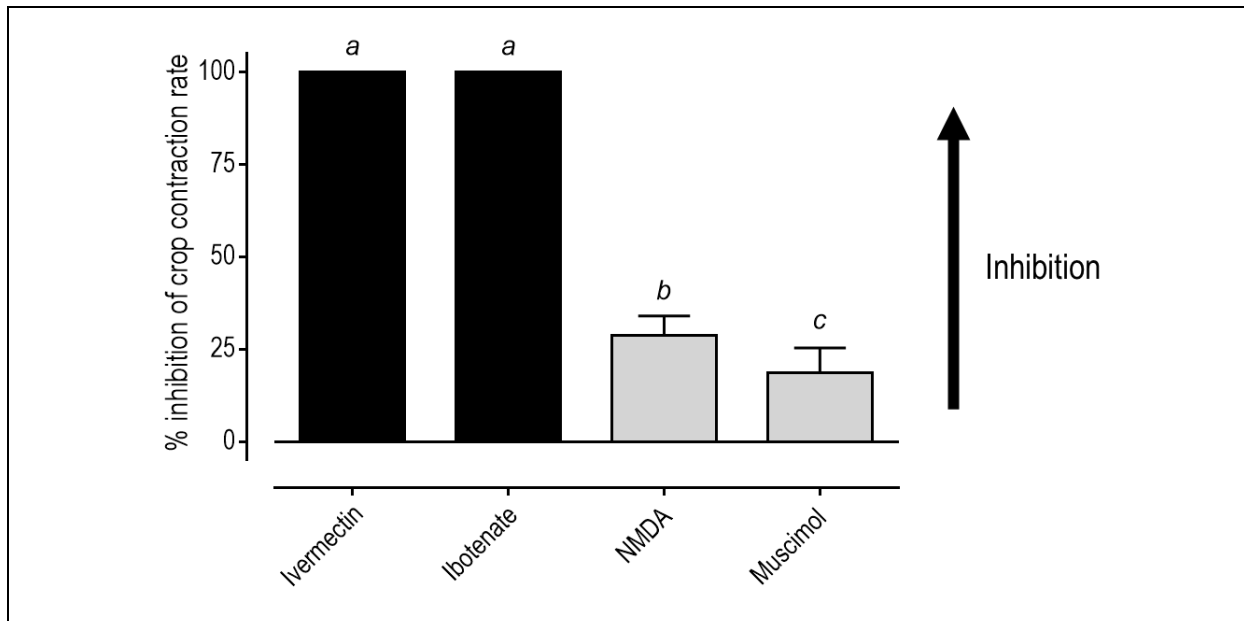

Fig. 5. Percent inhibition of spontaneous crop contraction rates by glutamate or GABA receptor agonists with significant effects. All were tested at 1 mM except for ivermectin (5  $\mu$ M). Values are means  $\pm$  SEM, based on the percent inhibition of control contraction rates in Supplemental Fig. 7. Lower-case letters and colors respectively indicate statistical and qualitative categorizations of the effects as in Fig. 3.

Given that GABA and acetylcholine inhibited crop contractions (Supplemental Fig. 6B-C; Fig. 4) we tested modulators of GABA and acetylcholine receptors, as well as acetylcholinesterase. As shown in Supplemental Fig. 7F and Fig. 5, muscimol (1 mM), a GABA-receptor agonist, inhibited crop contractions by ~20%, which was similar in magnitude to 1 mM GABA (Fig. 4). On the other hand, pilocarpine (10  $\mu$ M) and imidacloprid (10  $\mu$ M), agonists of muscarinic and nicotinic acetylcholine receptors, respectively, did not affect the frequency of crop contractions (Supplemental Fig. 8A-B). Acetylcholinesterase inhibitors (100  $\mu$ M carbaryl, 10  $\mu$ M propoxur, 10  $\mu$ M carvacrol) also did not affect crop contraction rates (Supplemental Fig. 8C-E).

Given the stimulatory effects of 1 mM OA (Supplemental Fig.6D; Fig. 4), we tested amitraz, an agonist of insect OA receptors. As shown in Fig. 6A, 10  $\mu$ M amitraz increased the frequency of crop contractions. We next determined whether OA was stimulatory at a lower concentration (10  $\mu$ M) and if CDIAL would inhibit the OA-stimulated crop contraction rates. As shown in Fig. 6B, 10  $\mu$ M OA stimulated crop contraction frequency and subsequent addition of 10  $\mu$ M CDIAL completely inhibited crop contractions. On the other hand, if crops were treated with 1% DMSO (CDIAL solvent) instead of CDIAL, then the OA-stimulated contraction frequency was unaffected (Supplemental Fig. 9). If crops were first treated with 10  $\mu$ M CDIAL, which stopped the spontaneous contractions, subsequent addition of OA had no effect (Fig. 6C).

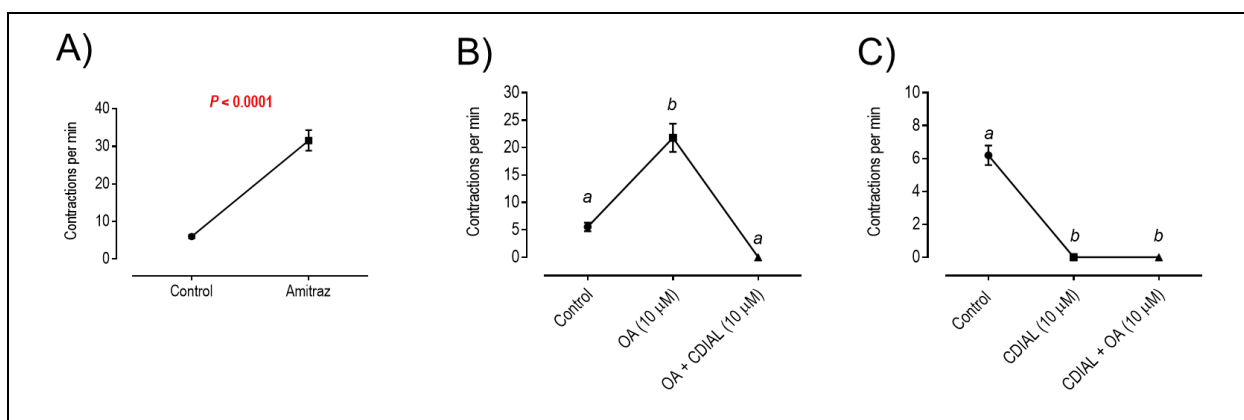

Fig. 6. Validation of an octopaminergic stimulatory pathway and its inhibition by CDIAL in the crop. A) Effects of 10  $\mu$ M amitraz on spontaneous peristaltic contractions of the crop. Values are means  $\pm$  SEM.  $P$  value from paired t-test is indicated.  $N = 9$ . B) Crops were stimulated with 10  $\mu$ M OA before addition of 10  $\mu$ M CDIAL ( $N = 5$ ). C) Crops were treated with 10  $\mu$ M CDIAL before addition of 10  $\mu$ M OA ( $N = 5$ ). In panels B & C, values are means  $\pm$  SEM, and lower-case letters indicate statistical categorization of the means as determined by a repeated measures one-way ANOVA and Tukey's multiple comparisons test ( $P < 0.05$ ).

#### *Modulators of plasma membrane $Ca^{2+}$ and TRP channels affect crop contraction frequency*

We next tested whether the inhibitory effects of CDIAL on crop contractions could potentially be explained by modulating plasma membrane  $Ca^{2+}$  channels. Previously we have shown that extracellular  $Ca^{2+}$  is required for the spontaneous contractions of the mosquito crop (Calkins et al., 2017), suggesting

the involvement of plasma membrane  $\text{Ca}^{2+}$  channels in myogenic activity. In the present study, we tested the effects of generic blockers of  $\text{Ca}^{2+}$ -channels:  $\text{Gd}^{3+}$ , SKF-96365, or nifedipine at 100  $\mu\text{M}$ . Each blocker completely inhibited the spontaneous crop contractions (Supplemental Fig. 10A-C; Fig. 7). Additional experiments at a lower concentration (10  $\mu\text{M}$ ) revealed complete inhibition of crop contractions by  $\text{Gd}^{3+}$  (Supplemental Fig. 10D; Fig. 7). Neither 10  $\mu\text{M}$  SKF-96365 nor 10  $\mu\text{M}$  nifedipine affected crop contractions, but the *P* value for nifedipine was near the threshold of significance (Supplemental Fig. 10E-F).

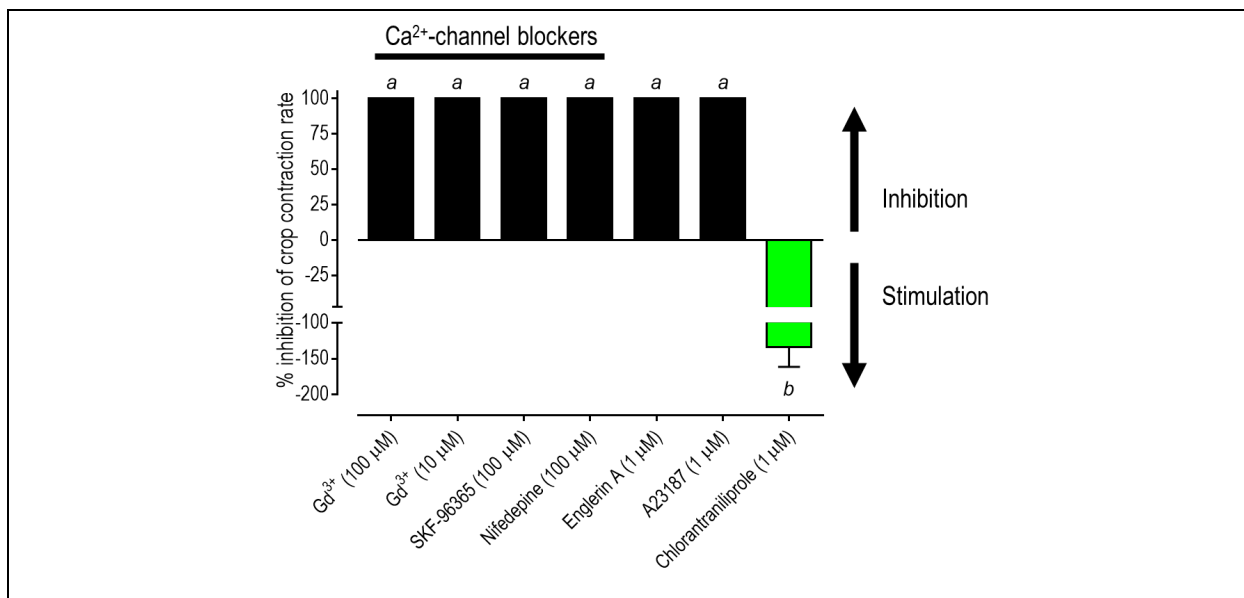

Fig. 7. Percent inhibition of spontaneous crop contraction rates by plasma membrane  $\text{Ca}^{2+}$  channel blockers, a TRP channel agonists (englerin A), a  $\text{Ca}^{2+}$  ionophore (A23187), or ryanodine receptor agonists (chlorantraniliprole) with significant effects. Values are means  $\pm$  SEM, based on the percent inhibition of control contraction rates in Supplemental Figs. 10-12. Lower-case letters and colors respectively indicate statistical and qualitative categorizations of the effects as in Fig. 3.

We also tested a few pharmacological agonists of TRP channels, which can mediate the influx of  $\text{Ca}^{2+}$  and/or other cations when activated. Pymetrozine (500  $\mu\text{M}$ ), an agonist of insect TRPV1 channels, did not affect the spontaneous contraction rates (Supplemental Fig. 11A). On the other hand, englerin A (1  $\mu\text{M}$ ),

a natural product agonist of mammalian TRPC channels (Akbulut et al., 2015; Carson et al., 2015), completely inhibited crop contractions (Supplemental Fig. 11B; Fig. 7).

*Modulators of intracellular  $Ca^{2+}$  homeostasis affect crop contraction frequency*

We next tested modulators of intracellular  $Ca^{2+}$  homeostasis on the spontaneous contractions of the crop. The  $Ca^{2+}$  ionophore A23187 (1  $\mu$ M) completely inhibited the frequency of crop contractions (Supplemental Fig. 12A; Fig. 7). However, neither thapsigargin (1  $\mu$ M), an inhibitor of intracellular  $Ca^{2+}$ -ATPases, nor ryanodine (10  $\mu$ M), an inhibitor of intracellular  $Ca^{2+}$  release channels (ryanodine receptors), had significant effects on crop contraction rates (Supplemental Fig. 12B-C). Intriguingly, chlorantraniliprole (1  $\mu$ M), an agonist of insect ryanodine receptors, increased crop contraction frequency by over 100% (Supplemental Fig. 12D; Fig. 7).

*CDIAL affects the shape of the crop in a  $Ca^{2+}$ -dependent manner*

To obtain additional insights into the mechanisms by which CDIAL may inhibit the spontaneous contractions of the crop we performed morphometric measurements before and after CDIAL treatment. In preliminary observations, we noticed that within 5 min after CDIAL treatment, the longitudinal diameter of the crop (distal to proximal length) contracted, resulting in a change of the crop's appearance from elongate to circular (Fig. 8).

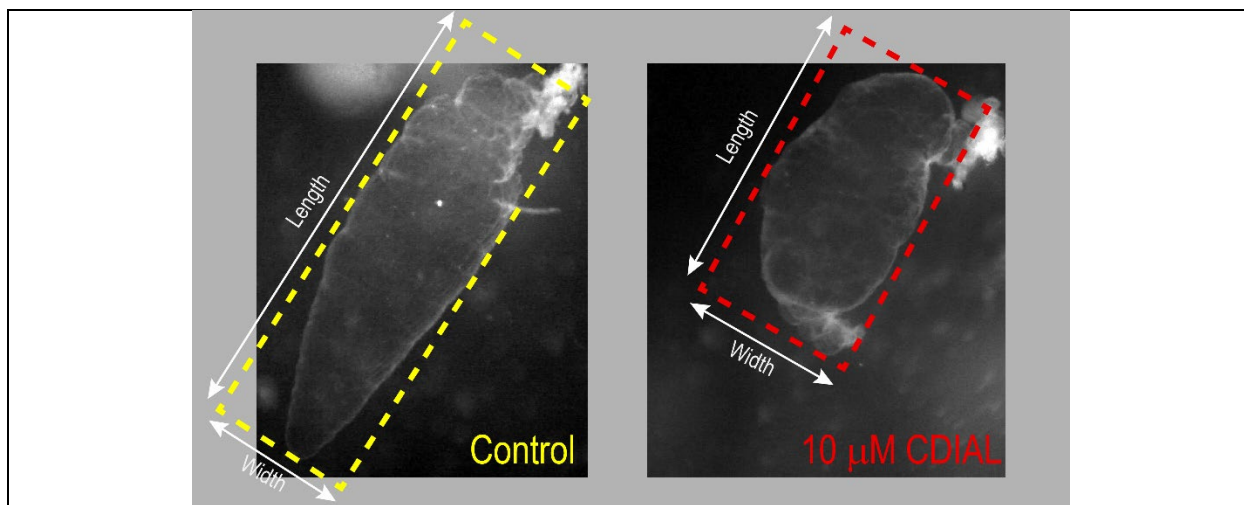

Fig. 8. Effects of CDIAL on crop shape. Representative images before (control) and 5 min after treatment of crops with 10  $\mu\text{M}$  CDIAL. Note the contraction in the length of the crop after CDIAL treatment, resulting in a more circular shape. The dashed boxes represent ‘object oriented bounding boxes’ drawn by the ‘MorphoLibJ’ plugin of *Fiji* image analysis software. The ‘oriented box elongation ratio’ is calculated by dividing the width of the box by its length. A ratio of 1.0 indicates a circular shape; a ratio  $<1.0$  indicates a more elongate shape.

This phenomenon was documented and quantified by capturing digital images of crops in their relaxed state before (control) and 5 min after treatment with 10  $\mu\text{M}$  CDIAL. From these images we used digital image analysis software to calculate the ‘oriented box elongation ratio’ (OBER), a simple measure of shape (width/length; Fig. 8). An OBER of 1.0 is indicative of a circular shape, whereas an OBER  $< 1.0$  indicates an elongate shape (Wirth, 2004). Remarkably, 10  $\mu\text{M}$  CDIAL increased the mean OBER of crops from  $\sim 0.42$  to 0.55, an increase of  $\sim 30\%$  (Fig. 9A; Fig. 10). In other words, the crops became more circular in shape. Likewise, 100  $\mu\text{M}$  CDIAL increased the mean OBER of crops from  $\sim 0.4$  to 0.6, an increase of  $\sim 60\%$  (Fig. 9B; Fig. 10).



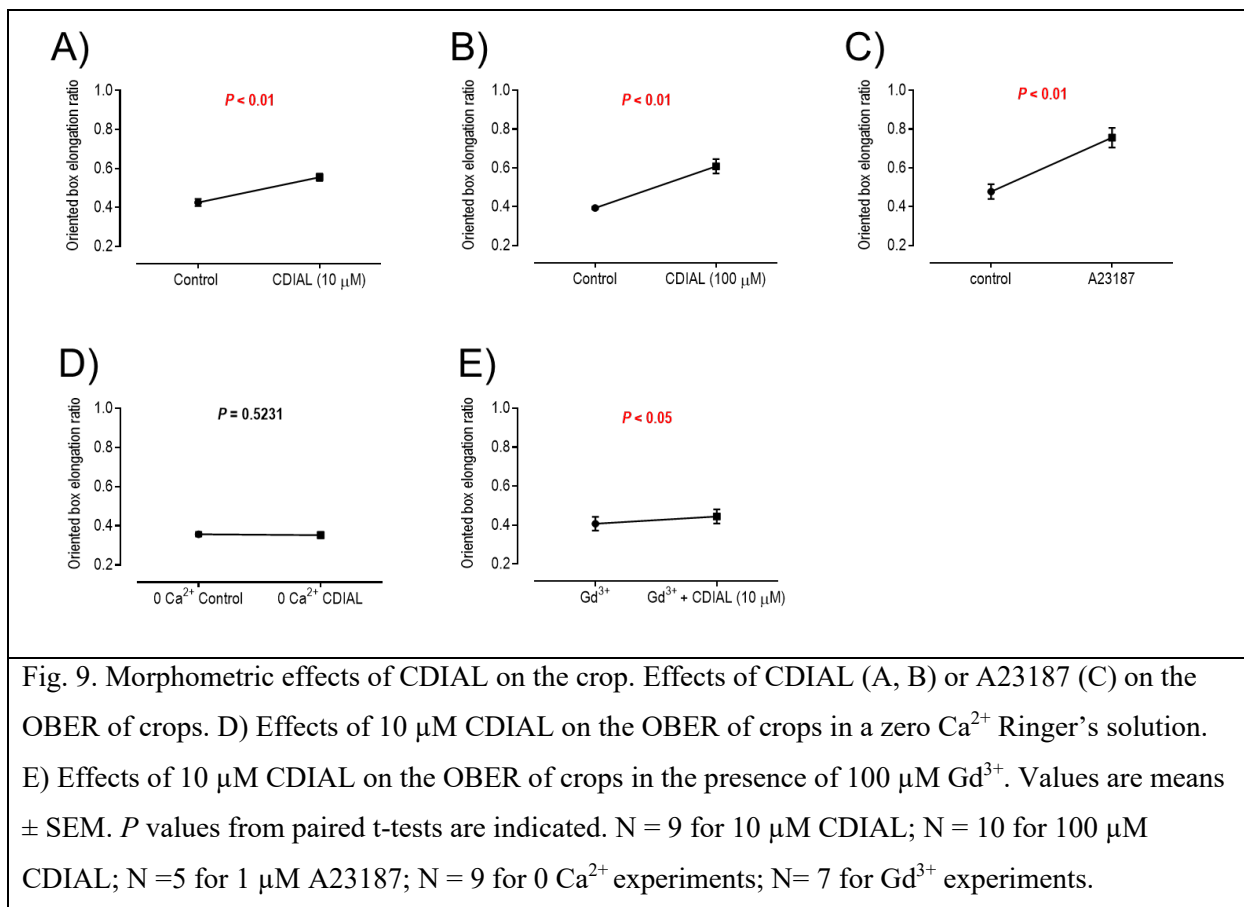

We next determined whether the pharmacological modulators that completely inhibited crop contractions (Figs. Fig. 4, Fig. 5, & Fig. 7) also affected crop shape like CDIAL. Among these compounds, only A23187 affected the OBER of crops, increasing it by ~60% (Fig. 9C; Fig. 10). The other compounds did not affect the OBER of crops (Supplemental Fig. 13). The similar effects of CDIAL and A23187 suggest that the shape change induced by CDIAL might involve an increase of intracellular Ca<sup>2+</sup>. Thus, we next tested the effects of CDIAL in a Ringer's solution with nominal Ca<sup>2+</sup>. As shown in Fig. 9D, when a zero Ca<sup>2+</sup> Ringer's solution was used, 10  $\mu$ M CDIAL did not affect the OBER of crops. To determine if plasma membrane Ca<sup>2+</sup>-channels contributed to the effects of CDIAL on crop shape we added 100  $\mu$ M Gd<sup>3+</sup> to the Ringer's solution. In the presence of Gd<sup>3+</sup>, 10  $\mu$ M CDIAL increased the OBER of crops, but only by ~10% (Fig. 9E; Fig. 10).

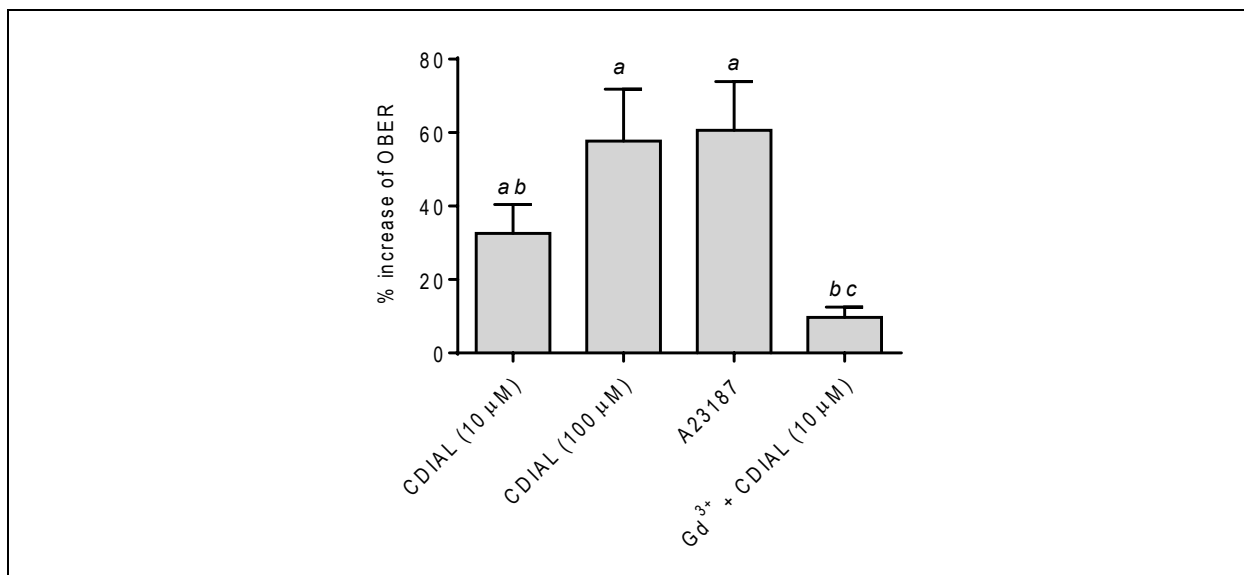

Fig. 10. Percent increase of the OBER of crops induced by CDIAL and A23187. Values are means  $\pm$  SEM based on the percent increase in OBER from the control in Fig. 9. Lower-case letters indicate statistical categorization of the means as determined by a repeated measures one-way ANOVA and Tukey's multiple comparisons test ( $P < 0.05$ ).

## Discussion

To our knowledge, the present study is the first to characterize the physiological effects of drimane sesquiterpenes on an isolated insect tissue. We demonstrated that CDIAL inhibited the spontaneous peristaltic contractions of visceral muscle in the ventral diverticulum (crop) and hindgut of adult female *Ae. aegypti*. In addition, CDIAL completely blocked the enhanced rate of crop contractions stimulated by 5-HT or OA. Thus, CDIAL likely disrupts an essential mechanism mediating the contraction of visceral muscle in the alimentary canal of mosquitoes. It remains to be determined whether CDIAL disrupts the activities of visceral muscle in other mosquito tissues (e.g., ovaries, heart) and/or other muscle types (e.g., flight muscle).

In addition to CDIAL, other natural drimane sesquiterpenes inhibited the spontaneous contractions of the crop, including CPCD, POLYG, and WARB. CPCD is a dimeric form of CDIAL that rapidly converts into CDIAL monomers in the presence of DMSO (Karmahapatra et al., 2018). As such, when CPCD was

dissolved in DMSO, it displayed similar inhibition as CDIAL. On the other hand, when CPCD was dissolved in acetone, it lacked effects on crop contractions, which confirms our earlier findings that CPCD has limited bioactivity in its dimeric form (Inocente et al., 2019; Karmahapatra et al., 2018). The strong inhibition of crop contractions by the dialdehydes CDIAL, POLYG and WARB, but not lactone derivatives with similar structures (CMOS, CML, and DRIM), indicate that electrophilic aldehydes are important in the bioactivity of drimane sesquiterpenes against mosquito visceral muscle. We have come to similar conclusions in previous studies regarding the insecticidal, antifeedant, and repellent bioactivities of these molecules (Inocente et al., 2019; Inocente et al., 2018; Manwill et al., 2020). However, in the present study one of the lactone derivatives (UGAN) modestly stimulated contractions of the crop. Moreover, in a previous study, we found that CML possessed comparable antifeedant activity to CDIAL (Inocente et al., 2019). Thus, although aldehydes are generally associated with the bioactivity of drimane sesquiterpenes in mosquitoes, they are not always essential.

In addition to the natural CDIAL derivatives, two semi-synthetic derivatives (CD08, CD09) were prominent inhibitors of crop contractions. CD09 is identical to CDIAL with the exception that the formyl group on C-8 was replaced with a methyl ketone (Supplemental Fig. 1), resulting in a less electrophilic molecule. In previous work we found that CD09 was similarly effective as CDIAL at killing larval and adult female mosquitoes, but a weaker antifeedant, suggesting that insecticidal activity can be maintained if the C-12 aldehyde was replaced with a more stable/less electrophilic moiety (Manwill et al., 2020). The inhibition of crop contractions by CD09 in the present study is consistent with this notion. CD08 is more substantially modified where the C-6 acetoxy group and C-9 aldehyde were each replaced with a ketone carbonyl (hydroquinone) and the C-12 aldehyde was extended with an ethyl formate linker (Supplemental Fig. 1). In previous work we found that CD08 was a superior larvicide compared to CDIAL, but did not kill adult females (Manwill et al., 2020). The inhibition of crop contractions in the present study indicates that CD08 is bioactive against adult female visceral muscle and would be expected to show adulticidal activity. Thus, the results are consistent with our previously suggested notion (Manwill et al., 2020) that

the lack of adulticidal activity by CD08 is due to more efficient detoxification and/or excretion in adults compared to larvae. Future studies on the metabolism of CD08 by mosquitoes are necessary to confirm this hypothesis.

Overall, results in the present study along with those in our previous studies characterizing mosquitocidal effects of CDIAL derivatives (Inocente et al., 2019; Inocente et al., 2018; Manwill et al., 2020) suggest there is a general direct correlation between the inhibition of visceral muscle activity in the crop and insecticidal activity of CDIAL derivatives (Fig. 3). In adult mosquitoes, the primary role of the crop is to store sugar meals (e.g., nectar), which are eventually transported to the midgut for digestion and absorption. Emptying of the crop's contents into the midgut relies on peristaltic contractions mediated by visceral muscle. Thus, adult mosquitoes treated with CDIAL may fail to empty their crops, which may starve mosquitoes of the energy needed for flight and other key physiological functions. Although larval mosquitoes lack a crop, previous studies have demonstrated that visceral muscle of the midgut undergoes 5-HT-dependent peristaltic contractions (Onken et al., 2004), which are likely involved in digestion and progression of the food bolus through the alimentary canal. If CDIAL also inhibits the 5-HT-dependent contractions in the midgut, then larval mosquitoes treated with CDIAL may experience digestive failure. Future studies are required to confirm effects on larval midgut contractions.

At least for CDIAL, we also found a strong inhibition of spontaneous contractions in the hindgut. In larval and adult mosquitoes, the hindgut plays a key role in excretion by reabsorbing solutes and water from the primary urine produced by Malpighian tubules (Piermarini, 2016). Moreover, the visceral muscular contractions of the hindgut play a key role in moving urine and excrement through the ileum and into the rectum before its expulsion. Thus, mosquitoes treated with CDIAL may experience osmoregulatory and/or excretory failure. Additional studies are required to confirm that the inhibition of visceral muscle activity by CDIAL observed *in vitro* in the present study also occurs *in vivo*.

### Hypothesized mode of insecticidal action for CDIAL

The results of the present study suggest that CDIAL inhibits crop contractions by disrupting intracellular  $\text{Ca}^{2+}$  homeostasis. Notably, the  $\text{Ca}^{2+}$  ionophore A23187 was the only pharmacological agent to completely inhibit the spontaneous contractions of the crop and change the shape of the crop (i.e., from elliptical to circular) in a similar manner as CDIAL. The change in shape was due to contraction of the distal end of the crop towards the proximal end. We interpret these results as CDIAL and A23187 each inducing an overload of intracellular  $\text{Ca}^{2+}$  leading to a sustained contractile state without relaxation (i.e., a tetanic paralysis). Although other pharmacological agents completely inhibited the crop (i.e., ivermectin,  $\text{Gd}^{3+}$ , nifedipine, SKF-96365, englerin A), they did not affect crop shape, suggesting induction of a sustained relaxed state (i.e., a flaccid paralysis). Consistent with our interpretations, CDIAL did not affect crop shape in the absence of extracellular  $\text{Ca}^{2+}$ . Moreover, the changes in shape induced by CDIAL were blunted by  $\text{Gd}^{3+}$ , implicating plasma membrane  $\text{Ca}^{2+}$  channels as likely primary or downstream targets of CDIAL. Given that the frequency of crop contractions was not affected by ryanodine or thapsigargin, and stimulated by chlorantraniliprole, it is unlikely that CDIAL directly agonizes or inhibits intracellular  $\text{Ca}^{2+}$  transport systems in the crop.

The specific plasma membrane  $\text{Ca}^{2+}$  channels that are directly or indirectly involved with the apparent tetanic paralysis induced by CDIAL remain to be determined. However, they are unlikely to be of the TRPV or TRPC (a.k.a TRP $\gamma$  in insects) varieties given pymetrozine's lack of effects on crop contraction frequency and the apparent flaccid paralysis induced by englerin A, respectively. The complete inhibition of crop contractions by 10  $\mu\text{M}$   $\text{Gd}^{3+}$  indicates the likely presence of ORAI and/or voltage-gated  $\text{Ca}^{2+}$  channels (Putney, 2010), but whether these are affected by CDIAL remains to be determined. Additional molecular, pharmacological, and reverse genetic studies will be required to elucidate the specific biochemical targets involved with the tetanic paralysis induced by CDIAL.

### Insights into the regulation and mechanisms of crop contractile activity

*Negative regulation of crop contractions via glutamate.* Among the neurotransmitters screened, glutamate was the most effective inhibitor of crop contractile activity. In comparison, acetylcholine and GABA had weak inhibitory effects, while histamine and aspartate were without detectable effects. The strong inhibitory effects of glutamate were most likely mediated by GluCl channels given the strong inhibition of crop contractions by ivermectin and ibotenate, which are known agonists of dipteran GluCl channels (Atif et al., 2020; Cully et al., 1996; Eguchi et al., 2006; Fuse et al., 2016; Meyers et al., 2015). When activated under physiological conditions GluCl channels mediate an inward Cl<sup>-</sup> conductance that hyperpolarizes nerve or muscle cells, thereby reducing the chances of an action potential and muscle activity (Wolstenholme, 2012). Consistent with this mode of action, despite completely inhibiting crop contractions, neither ivermectin nor ibotenate affected the shape of the crops, suggesting a flaccid paralysis wherein the muscle enters a sustained relaxed state. The present study is the first to demonstrate pharmacological evidence for GluCl channels in the crop of a dipteran. Future work will be required to confirm the molecular/biochemical presence of these channels in the mosquito crop.

*Positive regulation of crop contractions via OA.* The strong activation of crop contractile activity by OA and amitraz suggest the presence of OA receptors that stimulate myogenic activity when activated. These results contrast with those previously described in the crop of *D. melanogaster* where OA inhibited crop contractile activity (Solari et al., 2017), suggesting distinct roles of OA in regulating the crops of mosquitoes vs. fruit flies. In other insect systems, OA is a well-characterized modulator of visceral muscle activity. In the oviducts and/or bursa of *Locusta migratoria*, *Rhodnius prolixus*, *Stomoxys calcitrans*, and *D. melanogaster*, OA inhibits myogenic activity by causing a rise of intracellular cAMP (Cook and Wagner, 1992; Hana and Lange, 2017a, b; Lange and Orchard, 1986; Lange and Tsang, 1993; Nykamp and Lange, 2000; Orchard and Lange, 1985; Rodríguez-Valentín et al., 2006). On the other hand, in the spermathecae of *L. migratoria*, oviducts of *Gryllus bimaculatus* and *Ae. aegypti*, ovarian peritoneal sheath of *D. melanogaster*, and hindgut of *Ae. aegypti*, OA stimulates myogenic activity via an increase of intracellular Ca<sup>2+</sup> and/or cAMP (Clark and Lange, 2003; Messer and Brown, 1995; Middleton

et al., 2006; Sefiani, 1987; Tamashiro and Yoshino, 2014b). The varying physiological effects of OA among different tissues and species is likely a consequence of differential expression of OA receptor subtypes that signal to particular secondary messengers (Evans and Maqueira, 2005; Evans and Robb, 1993; Farooqui, 2012).

*Stimulatory effects of 5-HT and OA.* Taking the results of the present study together with those in our previous study (Calkins et al., 2017) indicate that the crop of *Ae. aegypti* has at least two physiological pathways for stimulating myogenic activity: serotonergic and octopaminergic. A previous study on the oviduct and hindgut of *Ae. aegypti* also found that 5-HT and OA each elicited stimulatory effects on myogenic activity (Messer and Brown, 1995). Thus, 5-HT and OA may play redundant physiological roles in mosquito visceral muscle. This is not always the case in insects. For example, in the locust oviduct, 5-HT stimulated myogenic activity (Lange, 2004), whereas OA inhibited it (Orchard and Lange, 1985). We have previously shown that the stimulation of myogenic activity in the mosquito crop by 5-HT is likely mediated by an increase of intracellular cAMP (Calkins et al., 2017); whether OA stimulates the crop via a similar or distinct mechanism remains to be determined. At least in the oviduct of *G. bimaculatus*, OA appears to signal to the opening of ryanodine receptors, which when activated increase the frequency of visceral muscle contractions (Tamashiro and Yoshino, 2014a, b). The stimulatory effect of chlorantraniliprole (a ryanodine receptor agonist) on the contraction frequency in the present study suggests that a similar stimulatory pathway may be present in the mosquito crop. Whether OA and/or 5-HT utilize this pathway in the crop and/or other mosquito visceral muscles remains to be determined. It would also be interesting to determine if the agonistic effects of UGAN on crop contractions found in the present study are mediated by influencing a biochemical target in the OA and/or 5-HT stimulatory pathway(s).

## Conclusions

In summary, the present study provides the first insights into the insecticidal mode of action of CDIAL and other drimane sesquiterpene dialdehydes against mosquitoes. CDIAL's complete inhibition of the spontaneous, 5-HT-stimulated and OA-stimulated contractions of the crop indicate disruption of a mechanism central to visceral muscle function. Collectively our data lead us to generate the hypothesis that CDIAL's disruption of visceral muscle activity is due to the onset of a tetanic paralysis caused by an overloading of intracellular  $Ca^{2+}$  via the activation of plasma membrane  $Ca^{2+}$  channels. We also found that CDIAL inhibited the spontaneous contractile activity of the mosquito hindgut suggesting a potentially universal disruption to visceral muscle in the alimentary canal that might lead to digestive, osmoregulatory, and/or excretory failure in mosquitoes *in vivo*. The present study also provides the first pharmacological evidence for putative roles of GluCl channels and OA receptors in regulating myogenic activity of the mosquito crop. The results of our study will guide future research aiming to develop natural product-inspired insecticides with novel modes of action and elucidate the molecular physiology of the mosquito crop.

### **Acknowledgments**

The authors thank Drs. Ryan Arvidson (College of Wooster), Reed Johnson (The Ohio State University), Angela Lange (University of Toronto Mississauga) and Ian Orchard (University of Toronto Mississauga) for valuable conversations about the present study. The authors are also grateful to Dr. John Beutler (National Cancer Institute, Molecular Targets Program, Bethesda, MD) who generously provided the englerin A used in the present study, and Mr. Erick Martinez Rodriguez and Ms. Nuris Acosta (The Ohio State University) for technical support.

### **Funding**

The research was funded by the following sources: state and federal funds appropriated to The Ohio State University, College of Food, Agricultural, and Environmental Sciences, Ohio Agricultural Research and



Development Center to P.M.P.; OSU Center for Applied Plant Sciences SEEDS grant (MSQT18) to P.M.P. and L.H.R.; and NIH grant R21AI129951 to P.M.P. and L.H.R. Mr. Anton Walter and Ms. Katharina Happel were supported by fellowships from the German Academic Exchange Service (DAAD) Research Internships in Science and Engineering program. Ms. Beenhwa Lee, Mr. Andrew DeLaat, and Ms. Bao Nguyen were in part supported by the OARDC Research Internship Program.

## Literature Cited

- Akbulut, Y., Gaunt, H.J., Muraki, K., Ludlow, M.J., Amer, M.S., Bruns, A., Vasudev, N.S., Radtke, L., Willot, M., Hahn, S., Seitz, T., Ziegler, S., Christmann, M., Beech, D.J., Waldmann, H., 2015. (-)-Englerin A is a Potent and Selective Activator of TRPC4 and TRPC5 Calcium Channels. *Angewandte Chemie International Edition* 54, 3787-3791.
- Anderson, J.A., Coats, J.R., 2012. Acetylcholinesterase inhibition by nootkatone and carvacrol in arthropods. *Pesticide Biochemistry and Physiology* 102, 124-128.
- Atif, M., Lynch, J.W., Keramidas, A., 2020. The effects of insecticides on two splice variants of the glutamate-gated chloride channel receptor of the major malaria vector, *Anopheles gambiae*. *British Journal of Pharmacology* 177, 175-187.
- Bhatt, D., Cooper, R.L., 2005. The pharmacological and physiological profile of glutamate receptors at the *Drosophila* larval neuromuscular junction. *Physiological Entomology* 30, 205-210.
- Browne, A., O'Donnell, M.J., 2018. Mechanisms of calcium sequestration by isolated Malpighian tubules of the house cricket *Acheta domesticus*. *Archives of Insect Biochemistry and Physiology* 97, e21431.
- Calkins, T.L., DeLaat, A., Piermarini, P.M., 2017. Physiological characterization and regulation of the contractile properties of the mosquito ventral diverticulum (crop). *Journal of Insect Physiology* 103, 98-106.
- Carson, C., Raman, P., Tullai, J., Xu, L., Henault, M., Thomas, E., Yeola, S., Lao, J., McPate, M., Verkuyl, J.M., Marsh, G., Sarber, J., Amaral, A., Bailey, S., Lubicka, D., Pham, H., Miranda, N., Ding, J., Tang, H.-M., Ju, H., Tranter, P., Ji, N., Krastel, P., Jain, R.K., Schumacher, A.M., Loureiro, J.J., George, E., Berellini, G., Ross, N.T., Bushell, S.M., Erdemli, G., Solomon, J.M., 2015. Englerin A Agonizes the TRPC4/C5 Cation Channels to Inhibit Tumor Cell Line Proliferation. *PLOS ONE* 10, e0127498.
- Chen, T., Zhu, J., Zhang, C., Huo, K., Fei, Z., Jiang, X.-f., 2013. Protective Effects of SKF-96365, a Non-Specific Inhibitor of SOCE, against MPP<sup>+</sup>-Induced Cytotoxicity in PC12 Cells: Potential Role of Homer1. *PLOS ONE* 8, e55601.

- Clark, J., Lange, A.B., 2003. Octopamine modulates spermathecal muscle contractions in *Locusta migratoria*. *Journal of Comparative Physiology A* 189, 105-114.
- Cook, B.J., Wagner, R.M., 1992. Some pharmacological properties of the oviduct muscularis of the stable fly *Stomoxys calcitrans*. *Comparative Biochemistry and Physiology Part C: Comparative Pharmacology* 102, 273-280.
- Cordova, D., Benner, E.A., Sacher, M.D., Rauh, J.J., Sopa, J.S., Lahm, G.P., Selby, T.P., Stevenson, T.M., Flexner, L., Gutteridge, S., Rhoades, D.F., Wu, L., Smith, R.M., Tao, Y., 2006. Anthranilic diamides: A new class of insecticides with a novel mode of action, ryanodine receptor activation. *Pesticide Biochemistry and Physiology* 84, 196-214.
- Cully, D.F., Paress, P.S., Liu, K.K., Schaeffer, J.M., Arena, J.P., 1996. Identification of a *Drosophila melanogaster* Glutamate-gated Chloride Channel Sensitive to the Antiparasitic Agent Avermectin. *Journal of Biological Chemistry* 271, 20187-20191.
- Day, M.F., 1954. The mechanism of food distribution to midgut or diverticula in the mosquito. *Aust J Biol Sci* 7, 515-524.
- Dube, K., McDonald, D.G., O'Donnell, M.J., 2000. Calcium transport by isolated anterior and posterior Malpighian tubules of *Drosophila melanogaster*: roles of sequestration and secretion. *Journal of Insect Physiology* 46, 1449-1460.
- Eguchi, Y., Ihara, M., Ochi, E., Shibata, Y., Matsuda, K., Fushiki, S., Sugama, H., Hamasaki, Y., Niwa, H., Wada, M., Ozoe, F., Ozoe, Y., 2006. Functional characterization of *Musca* glutamate- and GABA-gated chloride channels expressed independently and coexpressed in *Xenopus* oocytes. *Insect Molecular Biology* 15, 773-783.
- Engdahl, C., Knutsson, S., Fredriksson, S.-Å., Linusson, A., Bucht, G., Ekström, F., 2015. Acetylcholinesterases from the Disease Vectors *Aedes aegypti* and *Anopheles gambiae*: Functional Characterization and Comparisons with Vertebrate Orthologues. *PLOS ONE* 10, e0138598.
- Evans, P.D., Maqueira, B., 2005. Insect octopamine receptors: a new classification scheme based on studies of cloned *Drosophila* G-protein coupled receptors. *Invertebrate Neuroscience* 5, 111-118.

- Evans, P.D., Robb, S., 1993. Octopamine receptor subtypes and their modes of action. *Neurochemical Research* 18, 869-874.
- Farooqui, T., 2012. Review of octopamine in insect nervous systems. *Open Access Insect Physiol* 4, 1-17.
- Furutani, S., Nakatani, Y., Miura, Y., Ihara, M., Kai, K., Hayashi, H., Matsuda, K., 2014. GluCl a target of indole alkaloid okaramines: a 25 year enigma solved. *Scientific Reports* 4, 6190.
- Fuse, T., Kita, T., Nakata, Y., Ozoe, F., Ozoe, Y., 2016. Electrophysiological characterization of ivermectin triple actions on *Musca* chloride channels gated by l-glutamic acid and gamma-aminobutyric acid. *Insect Biochem Mol Biol* 77, 78-86.
- Gross, A.D., Bloomquist, J.R., 2018. Pharmacology of central octopaminergic and muscarinic pathways in *Drosophila melanogaster* larvae: Assessing the target potential of GPCRs. *Pesticide Biochemistry and Physiology* 151, 53-58.
- Han, T.H., Dharkar, P., Mayer, M.L., Serpe, M., 2015. Functional reconstitution of *Drosophila melanogaster* NMJ glutamate receptors. *Proceedings of the National Academy of Sciences* 112, 6182-6187.
- Hana, S., Lange, A.B., 2017a. Cloning and Functional Characterization of Oct $\beta$ 2-Receptor and Tyr1-Receptor in the Chagas Disease Vector, *Rhodnius prolixus*. *Frontiers in Physiology* 8.
- Hana, S., Lange, A.B., 2017b. Octopamine and tyramine regulate the activity of reproductive visceral muscles in the adult female blood-feeding bug, *Rhodnius prolixus*. *The Journal of Experimental Biology* 220, 1830-1836.
- He, D., Slobodnick, C., Rakotondraibe, L.H., 2017. Bioactive drimane sesquiterpenoids and aromatic glycosides from *Cinnamosma fragrans*. *Bioorg Med Chem Lett* 27, 1754-1759.
- Hemingway, J., Beaty, B.J., Rowland, M., Scott, T.W., Sharp, B.L., 2006. The Innovative Vector Control Consortium: improved control of mosquito-borne diseases. *Trends Parasitol* 22, 308-312.
- Hosie, A.M., Sattelle, D.B., 1996. Agonist pharmacology of two *Drosophila* GABA receptor splice variants. *British Journal of Pharmacology* 119, 1577-1585.

- Inocente, E.A., Nguyen, B., Manwill, P.K., Benatrehina, A., Kweka, E., Wu, S., Cheng, X., Rakotondraibe, L.H., Piermarini, P.M., 2019. Insecticidal and antifeedant activities of Malagasy medicinal plant (*Cinnamosma* sp.) extracts and drimane-type sesquiterpenes against *Aedes aegypti* mosquitoes. *Insects* 10, 373.
- Inocente, E.A., Shaya, M., Acosta, N., Rakotondraibe, L.H., Piermarini, P.M., 2018. A natural agonist of mosquito TRPA1 from the medicinal plant *Cinnamosma fragrans* that is toxic, antifeedant, and repellent to the yellow fever mosquito *Aedes aegypti*. *PLoS Negl Trop Dis* 12, e0006265.
- Jörs, S., Kazanski, V., Foik, A., Krautwurst, D., Harteneck, C., 2006. Receptor-induced Activation of *Drosophila* TRP $\gamma$  by Polyunsaturated Fatty Acids. *Journal of Biological Chemistry* 281, 29693-29702.
- Karmahapatra, S., Kientz, C., Shetty, S., Yalowich, J.C., Rakotondraibe, L.H., 2018. Capsicodendrin from *Cinnamosma fragrans* exhibits antiproliferative and cytotoxic activity in human leukemia cells: modulation by glutathione. *J Nat Prod* 81, 625-629.
- Kita, T., Hayashi, T., Ohtani, T., Takao, H., Takasu, H., Liu, G., Ohta, H., Ozoe, F., Ozoe, Y., 2017. Amitraz and its metabolite differentially activate  $\alpha$ - and  $\beta$ -adrenergic-like octopamine receptors. *Pest Management Science* 73, 984-990.
- Lahm, G.P., Stevenson, T.M., Selby, T.P., Freudenberger, J.H., Cordova, D., Flexner, L., Bellin, C.A., Dubas, C.M., Smith, B.K., Hughes, K.A., Hollingshaus, J.G., Clark, C.E., Benner, E.A., 2007. Rynaxypyr<sup>TM</sup>: A new insecticidal anthranilic diamide that acts as a potent and selective ryanodine receptor activator. *Bioorganic & Medicinal Chemistry Letters* 17, 6274-6279.
- Lange, A.B., 2004. A neurohormonal role for serotonin in the control of locust oviducts. *Archives of Insect Biochemistry and Physiology* 56, 179-190.
- Lange, A.B., Orchard, I., 1986. Identified octopaminergic neurons modulate contractions of locust visceral muscle via adenosine 3',5'-monophosphate (cyclic AMP). *Brain Research* 363, 340-349.
- Lange, A.B., Tsang, P.K.C., 1993. Biochemical and physiological effects of octopamine and selected octopamine agonists on the oviducts of *Locusta migratoria*. *Journal of Insect Physiology* 39, 393-400.

- Legland, D., Arganda-Carreras, I., Andrey, P., 2016. MorphoLibJ: integrated library and plugins for mathematical morphology with ImageJ. *Bioinformatics* 32, 3532-3534.
- Li, Y., Dharkar, P., Han, T.-H., Serpe, M., Lee, C.-H., Mayer, M.L., 2016. Novel Functional Properties of *Drosophila* CNS Glutamate Receptors. *Neuron* 92, 1036-1048.
- Liao, M., Xiao, J.-J., Zhou, L.-J., Liu, Y., Wu, X.-W., Hua, R.-M., Wang, G.-R., Cao, H.-Q., 2016. Insecticidal Activity of *Melaleuca alternifolia* Essential Oil and RNA-Seq Analysis of *Sitophilus zeamais* Transcriptome in Response to Oil Fumigation. *PLOS ONE* 11, e0167748.
- Lorsbach, B.A., Sparks, T.C., Cicchillo, R.M., Garizi, N.V., Hahn, D.R., Meyer, K.G., 2019. Natural products: a strategic lead generation approach in crop protection discovery. *Pest Management Science* 75, 2301-2309.
- MacPherson, M.R., Pollock, V.P., Broderick, K.E., Kean, L., O'Connell, F.C., Dow, J.A., Davies, S.A., 2001. Model organisms: new insights into ion channel and transporter function. L-type calcium channels regulate epithelial fluid transport in *Drosophila melanogaster*. *Am J Physiol Cell Physiol* 280, C394-407.
- Manwill, P.K., Kalsi, M., Wu, S., Martinez Rodriguez, E.J., Cheng, X., Piermarini, P.M., Rakotondraibe, H.L., 2020. Semi-synthetic cinnamodial analogues: Structural insights into the insecticidal and antifeedant activities of drimane sesquiterpenes against the mosquito *Aedes aegypti*. *PLoS Negl Trop Dis* 14, e0008073.
- McGonigle, I., Lummis, S.C.R., 2010. Molecular Characterization of Agonists That Bind to an Insect GABA Receptor. *Biochemistry* 49, 2897-2902.
- Messer, A.C., Brown, M.R., 1995. Non-linear dynamics of neurochemical modulation of mosquito oviduct and hindgut contractions. *Journal of Experimental Biology* 198, 2325-2336.
- Meyers, J.I., Gray, M., Kuklinski, W., Johnson, L.B., Snow, C.D., Black, W.C., Partin, K.M., Foy, B.D., 2015. Characterization of the target of ivermectin, the glutamate-gated chloride channel, from *Anopheles gambiae*. *The Journal of Experimental Biology* 218, 1478-1486.

Middleton, C.A., Nongthomba, U., Parry, K., Sweeney, S.T., Sparrow, J.C., Elliott, C.J.H., 2006.

Neuromuscular organization and aminergic modulation of contractions in the *Drosophila* ovary.

BMC Biology 4, 17.

Nesterov, A., Spalthoff, C., Kandasamy, R., Katana, R., Rankl, Nancy B., Andrés, M., Jähde, P., Dorsch,

John A., Stam, Lynn F., Braun, F.-J., Warren, B., Salgado, Vincent L., Göpfert, Martin C., 2015. TRP

Channels in Insect Stretch Receptors as Insecticide Targets. Neuron 86, 665-671.

Norris, E.J., Bartholomay, L., Coats, J., 2018. Present and Future Outlook: The Potential of Green

Chemistry in Vector Control, Advances in the Biorational Control of Medical and Veterinary Pests.

American Chemical Society, pp. 43-62.

Nykamp, D.A., Lange, A.B., 2000. Interaction between octopamine and proctolin on the oviducts of

*Locusta migratoria*. Journal of Insect Physiology 46, 809-816.

Onken, H., Moffett, S.B., Moffett, D.F., 2004. The anterior stomach of larval mosquitoes (*Aedes aegypti*):

effects of neuropeptides on transepithelial ion transport and muscular motility. Journal of

Experimental Biology 207, 3731-3739.

Orchard, I., Lange, A.B., 1985. Evidence for octopaminergic modulation of an insect visceral muscle.

Journal of Neurobiology 16, 171-181.

Piermarini, P.M., 2016. Renal Excretory Processes in Mosquitoes, in: Raikhel, A.S. (Ed.), Advances in

Insect Physiology. Academic Press, Oxford, pp. 393-433.

Piermarini, P.M., Hine, R.M., Schepel, M., Miyauchi, J.T., Beyenbach, K.W., 2011. Role of an apical

K,Cl cotransporter in urine formation by renal tubules of the yellow fever mosquito (*Aedes aegypti*).

Am J Physiol Regul Integr Comp Physiol 301, R1318-1337.

Putney, J.W., 2010. Pharmacology of store-operated calcium channels. Molecular interventions 10, 209-

218.

Rodríguez-Valentín, R., López-González, I., Jorquera, R., Labarca, P., Zurita, M., Reynaud, E., 2006.

Oviduct contraction in *Drosophila* is modulated by a neural network that is both, octopaminergic and

glutamatergic. Journal of Cellular Physiology 209, 183-198.

- Schindelin, J., Arganda-Carreras, I., Frise, E., Kaynig, V., Longair, M., Pietzsch, T., Preibisch, S., Rueden, C., Saalfeld, S., Schmid, B., Tinevez, J.-Y., White, D.J., Hartenstein, V., Eliceiri, K., Tomancak, P., Cardona, A., 2012. Fiji: an open-source platform for biological-image analysis. *Nature Methods* 9, 676-682.
- Sefiani, M., 1987. Regulation of egg laying and in vitro oviductal contractions in *Gryllus bimaculatus*. *Journal of Insect Physiology* 33, 215-222.
- Shaw, W.R., Catteruccia, F., 2019. Vector biology meets disease control: using basic research to fight vector-borne diseases. *Nature Microbiology* 4, 20-34.
- Solari, P., Rivelli, N., De Rose, F., Picciau, L., Murru, L., Stoffolano, J.G., Jr., Liscia, A., 2017. Opposite effects of 5-HT/AKH and octopamine on the crop contractions in adult *Drosophila melanogaster*: Evidence of a double brain-gut serotonergic circuitry. *PLOS ONE* 12, e0174172.
- Sparks, T.C., Wessels, F.J., Lorschach, B.A., Nugent, B.M., Watson, G.B., 2019. The new age of insecticide discovery-the crop protection industry and the impact of natural products. *Pestic Biochem Physiol.*
- Stoffolano, J.G., Haselton, A.T., 2013. The Adult Dipteran Crop: A Unique and Overlooked Organ. *Annual Review of Entomology* 58, 205-225.
- Swale, D.R., Carlier, P.R., Hartsel, J.A., Ma, M., Bloomquist, J.R., 2015. Mosquitocidal carbamates with low toxicity to agricultural pests: an advantageous property for insecticide resistance management. *Pest Management Science* 71, 1158-1164.
- Tamashiro, H., Yoshino, M., 2014a. Involvement of plasma membrane Ca<sup>2+</sup> channels, IP3 receptors, and ryanodine receptors in the generation of spontaneous rhythmic contractions of the cricket lateral oviduct. *Journal of Insect Physiology* 71, 97-104.
- Tamashiro, H., Yoshino, M., 2014b. Signaling pathway underlying the octopaminergic modulation of myogenic contraction in the cricket lateral oviduct. *Journal of Insect Physiology* 71, 30-36.



- Tong, F., Gross, A.D., Dolan, M.C., Coats, J.R., 2013. The phenolic monoterpene carvacrol inhibits the binding of nicotine to the housefly nicotinic acetylcholine receptor. *Pest Management Science* 69, 775-780.
- Trembley, H.L., 1952. The Distribution of Certain Liquids in the Esophageal Diverticula and Stomach of Mosquitoes. *The American Journal of Tropical Medicine and Hygiene* 1, 693-710.
- Wegener, C., Nässel, D.R., 2000. Peptide-Induced  $Ca^{2+}$  Movements in a Tonic Insect Muscle: Effects of Proctolin and Periviscerokinin-2. *J Neurophysiol* 84, 3056-3066.
- Wirth, M.A., 2004. Shape Analysis & Measurement. Purdue University Cytometry.  
<http://www.cyto.purdue.edu/cdroms/micro2/content/education/wirth10.pdf>
- Wolstenholme, A.J., 2012. Glutamate-gated Chloride Channels. *The Journal of Biological Chemistry* 287, 40232-40238.
- Xia, S., Miyashita, T., Fu, T.-F., Lin, W.-Y., Wu, C.-L., Pyzocha, L., Lin, I.-R., Saitoe, M., Tully, T., Chiang, A.-S., 2005. NMDA Receptors Mediate Olfactory Learning and Memory in *Drosophila*. *Current Biology* 15, 603-615.
- Yu, M.J., Beyenbach, K.W., 2002. Leucokinin activates  $Ca^{2+}$ -dependent signal pathway in principal cells of *Aedes aegypti* Malpighian tubules. *Am J Physiol Renal Physiol* 283, F499-F508.
- Zhuang, A.-X., Zhang, Y.-X., Zhang, H., Liu, Z.-W., 2016. The insecticidal activity and action mode of an imidacloprid analogue, 1-(3-pyridylmethyl)-2-nitroimino-imidazolidine. *Insect Science* 23, 688-694.
